# Supplementary material for: Centromere Remodeling in Hoolock leuconedys (Hylobatidae) by a New Transposable Element Unique to the Gibbons
Source: PubMed Central journal article supplement — Genome Biol Evol. 2012 May 16;4(7):760–70. doi: 10.1093/gbe/evs048 (PMC3606032; doi:10.1093/gbe/evs048), 2012-05-16
Supplement: supp_evs048_Table_S3.pdf [file supp_evs048_Table_S3.pdf]

| BAC Acc. Number | Position in query |        | Strain | Matching repeat |                | Position in Repeat |      |      | U2 Size | U1 Size | Target Site Duplication | Target site |
|-----------------|-------------------|--------|--------|-----------------|----------------|--------------------|------|------|---------|---------|-------------------------|-------------|
|                 | Start             | Stop   |        | Repeat          | Class/Family   | Start              | Stop | left |         |         |                         |             |
| CT990552.5      | 150787            | 150819 | +      | AT_rich         | Low_complexity | 1                  | 33   | 0    | 156     | 28      | ABSENT                  |             |
|                 | 150820            | 150982 | +      | L1ME5           | LINE/L1        | 5941               | 6126 | -68  |         |         |                         |             |
|                 | 151002            | 151034 | +      | (GAA)n          | Simple_repeat  | 2                  | 33   | 0    |         |         |                         |             |
|                 | 151138            | 151261 | C      | AluSz           | SINE/Alu       | -182               | 130  | 1    |         |         |                         |             |
|                 | 151289            | 151515 | C      | SVA_A           | Other          | -686               | 701  | 467  |         |         |                         |             |
| AC187943.2      | 26381             | 26950  | +      | SVA_A           | Other          | 142                | 701  | -686 | 190     | 29      | AAGGCCTTCATTGG          | CCTT/AA     |
|                 | 26979             | 27086  | +      | AluSz6          | SINE/Alu       | 1                  | 108  | -204 |         |         |                         |             |
|                 | 27162             | 27229  | +      | T-rich          | Low_complexity | 3                  | 70   | 0    |         |         |                         |             |
|                 | 27276             | 27406  | C      | L1ME5           | LINE/L1        | -117               | 6077 | 5941 |         |         |                         |             |
| AC190010.2      | 52786             | 52948  | +      | L1ME5           | LINE/L1        | 5941               | 6126 | -68  | 171     | 25      | AAACATTTGAACA           | GTTT/AG     |
|                 | 53119             | 53225  | C      | AluSz6          | SINE/Alu       | -204               | 108  | 2    |         |         |                         |             |
|                 | 53250             | 53663  | C      | SVA_A           | Other          | -511               | 876  | 437  |         |         |                         |             |
| CT954299.8      | 136672            | 137040 | +      | SVA_A           | Other          | 451                | 831  | -556 | 156     | 29      | GAAAAAAGTGCCTTT         | TTTC/AA     |
|                 | 137069            | 137188 | +      | AluSz6          | SINE/Alu       | 1                  | 130  | -182 |         |         |                         |             |
|                 | 137344            | 137503 | C      | L1ME5           | LINE/L1        | -68                | 6126 | 5941 |         |         |                         |             |
| AC199991.2      | 125610            | 125772 | +      | L1ME5           | LINE/L1        | 5941               | 6126 | -68  | 171     | 29      | AAGTGGGATTAA/gCA        | ACTT/AT     |
|                 | 125792            | 125824 | +      | (GAA)n          | Simple_repeat  | 2                  | 33   | 0    |         |         |                         |             |
|                 | 125943            | 126050 | C      | AluSz6          | SINE/Alu       | -204               | 108  | 1    |         |         |                         |             |
|                 | 126079            | 126601 | C      | SVA_A           | Other          | -515               | 872  | 436  |         |         |                         |             |
| AC198155.2      | 114762            | 114917 | +      | L1ME5           | LINE/L1        | 5941               | 6126 | -68  | 169     | 24      | AAGATATAAATGTTTC        | TCTT/AA     |
|                 | 115086            | 115192 | C      | AluSz6          | SINE/Alu       | -204               | 108  | 1    |         |         |                         |             |
|                 | 115216            | 115647 | C      | SVA_A           | Other          | -511               | 876  | 435  |         |         |                         |             |
| AC198875.2      | 118433            | 119337 | +      | SVA_A           | Other          | 9                  | 872  | -515 | 150     | 29      | AAAATGGATGAAAGA         | TTTT/AA     |
|                 | 119351            | 119527 | +      | SVA_A           | Other          | 395                | 584  | -803 |         |         |                         |             |
|                 | 119556            | 119678 | +      | AluSz6          | SINE/Alu       | 1                  | 130  | -182 |         |         |                         |             |
|                 | 119828            | 119989 | C      | L1ME5           | LINE/L1        | -68                | 6126 | 5941 |         |         |                         |             |
| AC202760.1      | 170786            | 171917 | +      | SVA_A           | Other          | 116                | 872  | -515 | 156     | 65      | AAAATGAAGTTGG           | TTTT/TT     |
|                 | 171929            | 173605 | +      | SVA_A           | Other          | 436                | 872  | -515 |         |         |                         |             |
|                 | 173612            | 174033 | +      | SVA_A           | Other          | 436                | 872  | -515 |         |         |                         |             |
|                 | 174098            | 174219 | +      | AluSz6          | SINE/Alu       | 1                  | 130  | -182 |         |         |                         |             |
|                 | 174323            | 174355 | +      | (TTC)n          | Simple_repeat  | 2                  | 33   | 0    |         |         |                         |             |
|                 | 174375            | 174531 | C      | L1ME5           | LINE/L1        | -68                | 6126 | 5945 |         |         |                         |             |

| BAC Acc. Number | Position in query |        | Strain | Matching repeat |                | Position in Repeat |      |      | U2 Size | U1 Size | Target Site Duplication   | Target site |
|-----------------|-------------------|--------|--------|-----------------|----------------|--------------------|------|------|---------|---------|---------------------------|-------------|
|                 | Start             | Stop   |        | Repeat          | Class/Family   | Start              | Stop | left |         |         |                           |             |
| AC199992.2      | 72024             | 73400  | +      | SVA_A           | Other          | 436                | 872  | -515 | 153     | 30      | Ns at target site         |             |
|                 | 73402             | 74110  | +      | SVA_A           | Other          | 436                | 872  | -515 |         |         |                           |             |
|                 | 74140             | 74262  | +      | AluSz6          | SINE/Alu       | 1                  | 130  | -182 |         |         |                           |             |
|                 | 74415             | 74574  | C      | L1ME5           | LINE/L1        | -68                | 6126 | 5941 |         |         |                           |             |
| AC198102.2      | 18364             | 19155  | +      | SVA_A           | Other          | 436                | 872  | -515 | 154     | 29      | AGAAGGGGCAGGGT            | TCTT/GA     |
|                 | 19184             | 19306  | +      | AluSz6          | SINE/Alu       | 1                  | 130  | -182 |         |         |                           |             |
|                 | 19371             | 19444  | +      | CT-rich         | Low_complexity | 1                  | 72   | 0    |         |         |                           |             |
|                 | 19460             | 19622  | C      | L1ME5           | LINE/L1        | -68                | 6126 | 5941 |         |         |                           |             |
|                 | 19632             | 19673  | +      | (A)n            | Simple_repeat  | 1                  | 42   | 0    |         |         |                           |             |
| AC200373.2      | 128684            | 128708 | +      | AT_rich         | Low_complexity | 1                  | 25   | 0    | 156     | 30      | insertion into polyA-tail |             |
|                 | 128709            | 128867 | +      | L1ME5           | LINE/L1        | 5941               | 6126 | -68  |         |         |                           |             |
|                 | 128887            | 128919 | +      | (GAA)n          | Simple_repeat  | 2                  | 33   | 0    |         |         |                           |             |
|                 | 129023            | 129145 | C      | AluSz6          | SINE/Alu       | -182               | 130  | 1    |         |         |                           |             |
|                 | 129175            | 130307 | C      | SVA_A           | Other          | -515               | 872  | 4    |         |         |                           |             |
| AC200373.2      | 145247            | 145274 | +      | AT_rich         | Low_complexity | 1                  | 28   | 0    |         |         | AAAATGCAAATGCTC           | TTTT/AA     |
|                 | 145278            | 145440 | +      | L1ME5           | LINE/L1        | 5941               | 6126 | -68  |         |         |                           |             |
|                 | 145464            | 145496 | +      | (GAA)n          | Simple_repeat  | 2                  | 33   | 0    |         |         |                           |             |
|                 | 145615            | 145720 | C      | AluSz6          | SINE/Alu       | -204               | 108  | 3    |         |         |                           |             |
|                 | 145787            | 146775 | C      | SVA_A           | Other          | -515               | 872  | 436  |         |         |                           |             |
|                 | 146820            | 147225 | C      | SVA_A           | Other          | -515               | 872  | 437  |         |         |                           |             |
|                 | 147274            | 147684 | C      | SVA_A           | Other          | -519               | 868  | 437  |         |         |                           |             |
|                 | 147696            | 148795 | C      | SVA_A           | Other          | -515               | 872  | 436  |         |         |                           |             |
| AC200383.2      | 116780            | 117964 | +      | SVA_A           | Other          | 3                  | 885  | -502 | 156     | 14      | AAGAGATGAAG               | TCTT/GA     |
|                 | 117978            | 118100 | +      | AluSz6          | SINE/Alu       | 1                  | 130  | -182 |         |         |                           |             |
|                 | 118204            | 118236 | +      | (TTC)n          | Simple_repeat  | 2                  | 33   | 0    |         |         |                           |             |
|                 | 118256            | 118418 | C      | L1ME5           | LINE/L1        | -68                | 6126 | 5941 |         |         |                           |             |
| AC203718.2      | 150972            | 151610 | +      | SVA_B           | Other          | 213                | 867  | -516 | 153     | 29      | AT-rich sequence          |             |
|                 | 151621            | 151871 | +      | SVA_A           | Other          | 404                | 701  | -686 |         |         |                           |             |
|                 | 151900            | 152022 | +      | AluSz6          | SINE/Alu       | 1                  | 130  | -182 |         |         |                           |             |
|                 | 152175            | 152337 | C      | L1ME5           | LINE/L1        | -68                | 6126 | 5941 |         |         |                           |             |
|                 | 152338            | 152378 | +      | AT_rich         | Low_complexity | 1                  | 41   | 0    |         |         |                           |             |

| BAC Acc. Number | Position in query |        | Strain | Matching repeat |                | Position in Repeat |      |      | U2 Size | U1 Size | Target Site Duplication | Target site |
|-----------------|-------------------|--------|--------|-----------------|----------------|--------------------|------|------|---------|---------|-------------------------|-------------|
|                 | Start             | Stop   |        | Repeat          | Class/Family   | Start              | Stop | left |         |         |                         |             |
| AC203714.2      | 309               | 464    | +      | L1ME5           | LINE/L1        | 5941               | 6126 | -68  | 157     | 29      | AAGAAGAAAATT-/tCCT      | TCTT/AT     |
|                 | 484               | 557    | +      | GA-rich         | Low_complexity | 2                  | 74   | 0    |         |         |                         |             |
|                 | 621               | 740    | C      | AluSz6          | SINE/Alu       | -182               | 130  | 1    |         |         |                         |             |
|                 | 769               | 998    | C      | SVA_A           | Other          | -727               | 660  | 435  |         |         |                         |             |
|                 | 1041              | 2320   | C      | SVA_A           | Other          | -515               | 872  | 436  |         |         |                         |             |
|                 | 2321              | 4157   | C      | SVA_B           | Other          | -515               | 872  | 151  |         |         |                         |             |
| AC203721.2      | 110178            | 110903 | +      | SVA_A           | Other          | 64                 | 875  | -512 | 156     | 25      | AAAATGTTGGGATTACA       | TTTT/TG     |
|                 | 110928            | 111047 | +      | AluSz6          | SINE/Alu       | 1                  | 130  | -182 |         |         |                         |             |
|                 | 111203            | 111362 | C      | L1ME5           | LINE/L1        | -68                | 6126 | 5941 |         |         |                         |             |
|                 | 111363            | 111397 | +      | AT_rich         | Low_complexity | 1                  | 35   | 0    |         |         |                         |             |
| AC204794.2      | 1232              | 1391   | +      | L1ME5           | LINE/L1        | 5941               | 6126 | -68  | 156     | 29      | AAAATTATTTCTC           | TTTT/AG     |
|                 | 1547              | 1666   | C      | AluSz6          | SINE/Alu       | -182               | 130  | 1    |         |         |                         |             |
|                 | 1695              | 2037   | C      | SVA_A           | Other          | -593               | 794  | 436  |         |         |                         |             |
|                 | 2049              | 2460   | C      | SVA_A           | Other          | -517               | 870  | 437  |         |         |                         |             |
|                 | 2507              | 3214   | C      | SVA_A           | Other          | -515               | 872  | 160  |         |         |                         |             |
| AC204185.2      | 166116            | 166138 | +      | AT_rich         | Low_complexity | 1                  | 23   | 0    | 171     | 29      | AAAAGAATAG              | TTTT/AA     |
|                 | 166174            | 166336 | +      | L1ME5           | LINE/L1        | 5941               | 6126 | -68  |         |         |                         |             |
|                 | 166507            | 166614 | C      | AluSz6          | SINE/Alu       | -204               | 108  | 1    |         |         |                         |             |
|                 | 166643            | 166803 | C      | SVA_A           | Other          | -593               | 794  | 627  |         |         |                         |             |
| AC206079.2      | 61415             | 61436  | +      | AT_rich         | Low_complexity | 1                  | 22   | 0    | 169     | 107     | AAGAATATCCTCAGGATT      | TCTT/AA     |
|                 | 61437             | 61596  | +      | L1ME5           | LINE/L1        | 5941               | 6126 | -68  |         |         |                         |             |
|                 | 61765             | 61871  | C      | AluSz6          | SINE/Alu       | -204               | 108  | 1    |         |         |                         |             |
|                 | 61978             | 62516  | C      | SVA_A           | Other          | -515               | 872  | 436  |         |         |                         |             |
| AC207854.2      | 168332            | 169008 | +      | SVA_A           | Other          | 436                | 872  | -515 | 152     | 29      |                         |             |
|                 | 169037            | 169159 | +      | AluSz6          | SINE/Alu       | 1                  | 130  | -182 |         |         |                         |             |
|                 | 169259            | 169291 | +      | (TTC)n          | Simple_repeat  | 2                  | 33   | 0    |         |         |                         |             |
|                 | 169311            | 169473 | C      | L1ME5           | LINE/L1        | -68                | 6126 | 5941 |         |         |                         |             |
|                 | 169477            | 169510 | +      | (TAAAAA)n       | Simple_repeat  | 2                  | 36   | 0    |         |         |                         |             |
| AC205441.3      | 61612             | 62764  | +      | SVA_A           | Other          | 436                | 872  | -515 | 153     | 24      | poly-A sequence         |             |
|                 | 62808             | 64110  | +      | SVA_A           | Other          | 436                | 876  | -511 |         |         |                         |             |
|                 | 64134             | 64256  | +      | AluSz6          | SINE/Alu       | 1                  | 130  | -182 |         |         |                         |             |
|                 | 64409             | 64568  | C      | L1ME5           | LINE/L1        | -68                | 6126 | 5941 |         |         |                         |             |
|                 | 64569             | 64589  | +      | AT_rich         | Low_complexity | 1                  | 21   | 0    |         |         |                         |             |

| BAC Acc. Number | Position in query |        | Strain | Matching repeat |                | Position in Repeat |      |      | U2 Size | U1 Size | Target Site Duplication               | Target site |
|-----------------|-------------------|--------|--------|-----------------|----------------|--------------------|------|------|---------|---------|---------------------------------------|-------------|
|                 | Start             | Stop   |        | Repeat          | Class/Family   | Start              | Stop | left |         |         |                                       |             |
| AC203720.2      | 98665             | 98697  | +      | (T)n            | Simple_repeat  | 1                  | 33   | 0    | 156     | 24      | AAGGATGTGG                            |             |
|                 | 98698             | 98857  | +      | L1ME5           | LINE/L1        | 5941               | 6126 | -68  |         |         |                                       |             |
|                 | 99013             | 99135  | C      | AluSz6          | SINE/Alu       | -182               | 130  | 1    |         |         |                                       |             |
|                 | 99159             | 100592 | C      | SVA_A           | Other          | -511               | 876  | 436  |         |         |                                       |             |
|                 | 100638            | 101925 | C      | SVA_A           | Other          | -515               | 872  | 142  |         |         |                                       |             |
| AC203720.2      | 125944            | 127435 | +      | SVA_A           | Other          | 142                | 872  | -515 | 169     | 29      | AAGGATGTGG                            |             |
|                 | 127436            | 128201 | +      | SVA_A           | Other          | 436                | 870  | -517 |         |         |                                       |             |
|                 | 128230            | 128337 | +      | AluSz6          | SINE/Alu       | 1                  | 108  | -204 |         |         |                                       |             |
|                 | 128506            | 128662 | C      | L1ME5           | LINE/L1        | -68                | 6126 | 5945 |         |         |                                       |             |
|                 | 128664            | 128688 | +      | AT_rich         | Low_complexity | 1                  | 25   | 0    |         |         |                                       |             |
| AC207853.2      | 76286             | 76309  | +      | AT_rich         | Low_complexity | 1                  | 24   | 0    |         |         | Ns in flanking at beginnin of element |             |
|                 | 76310             | 76472  | +      | L1ME5           | LINE/L1        | 5941               | 6126 | -68  |         |         |                                       |             |
|                 | 76492             | 76524  | +      | (GAA)n          | Simple_repeat  | 2                  | 33   | 0    |         |         |                                       |             |
|                 | 76628             | 76749  | C      | AluSz6          | SINE/Alu       | -182               | 130  | 2    |         |         |                                       |             |
|                 | 76779             | 77344  | C      | SVA_A           | Other          | -517               | 870  | 436  |         |         |                                       |             |
| AC204186.3      | 96756             | 97260  | +      | SVA_B           | Other          | 347                | 865  | -518 | 169     | 65      | Ns at target site                     |             |
|                 | 97309             | 97725  | +      | SVA_A           | Other          | 436                | 872  | -515 |         |         |                                       |             |
|                 | 97790             | 97897  | +      | AluSz6          | SINE/Alu       | 1                  | 108  | -204 |         |         |                                       |             |
|                 | 98066             | 98225  | C      | L1ME5           | LINE/L1        | -68                | 6126 | 5941 |         |         |                                       |             |
|                 | 98226             | 98250  | +      | AT_rich         | Low_complexity | 1                  | 25   | 0    |         |         |                                       |             |
| AC216158.2      | 177170            | 178486 | +      | SVA_A           | Other          | 436                | 872  | -515 | 209     | 24      | AGAAATATTTGCTGAAGTC                   | TTCT/AT     |
|                 | 178488            | 178912 | +      | SVA_A           | Other          | 436                | 876  | -511 |         |         |                                       |             |
|                 | 178936            | 179042 | +      | AluSz6          | SINE/Alu       | 1                  | 108  | -204 |         |         |                                       |             |
|                 | 179251            | 179370 | C      | L1ME5           | LINE/L1        | -133               | 6061 | 5941 |         |         |                                       |             |
|                 | 179371            | 179412 | +      | A-rich          | Low_complexity | 1                  | 42   | 0    |         |         |                                       |             |
| AC208823.3      | 8006              | 8909   | +      | SVA_A           | Other          | 436                | 870  | -517 | 156     | 29      | AAAGAATGGGCAAGG                       | CTTT/GT     |
|                 | 8938              | 9058   | +      | AluSz6          | SINE/Alu       | 1                  | 130  | -182 |         |         |                                       |             |
|                 | 9162              | 9194   | +      | (TTC)n          | Simple_repeat  | 2                  | 33   | 0    |         |         |                                       |             |
|                 | 9214              | 9372   | C      | L1ME5           | LINE/L1        | -68                | 6126 | 5941 |         |         |                                       |             |
|                 | 9373              | 9423   | +      | A-rich          | Low_complexity | 1                  | 48   | 0    |         |         |                                       |             |
| AC217745.2      | 120834            | 122427 | +      | SVA_A           | Other          | 61                 | 876  | -511 | 168     | 24      | AAAAGTAAGAAATTG                       | TTTT/GT     |
|                 | 122451            | 122558 | +      | AluSz6          | SINE/Alu       | 1                  | 108  | -204 |         |         |                                       |             |
|                 | 122726            | 122882 | C      | L1ME5           | LINE/L1        | -68                | 6126 | 5945 |         |         |                                       |             |
|                 | 122884            | 122933 | +      | A-rich          | Low_complexity | 1                  | 50   | 0    |         |         |                                       |             |

| BAC Acc. Number | Position in query |        |        | Matching repeat |                | Position in Repeat |      |      | U2 Size | U1 Size | Target Site Duplication | Target site |
|-----------------|-------------------|--------|--------|-----------------|----------------|--------------------|------|------|---------|---------|-------------------------|-------------|
|                 | Start             | Stop   | Strain | Repeat          | Class/Family   | Start              | Stop | left |         |         |                         |             |
| AC215319.3      | 41070             | 42642  | +      | SVA_A           | Other          | 15                 | 872  | -515 | 169     | 29      | UNKNOWN                 |             |
|                 | 42671             | 42778  | +      | AluSz6          | SINE/Alu       | 1                  | 108  | -204 |         |         |                         |             |
|                 | 42947             | 43109  | C      | L1ME5           | LINE/L1        | -68                | 6126 | 5941 |         |         |                         |             |
|                 | 43110             | 43132  | +      | AT_rich         | Low_complexity | 1                  | 23   | 0    |         |         |                         |             |
| AC216139.3      | 67922             | 68022  | +      | SVA_A           | Other          | 777                | 875  | -512 | 157     | 25      | ACAAAATTAGCCAGGCATG     | TTGT/AT     |
|                 | 68047             | 68166  | +      | AluSz6          | SINE/Alu       | 1                  | 130  | -182 |         |         |                         |             |
|                 | 68230             | 68303  | +      | CT-rich         | Low_complexity | 2                  | 72   | 0    |         |         |                         |             |
|                 | 68323             | 68482  | C      | L1ME5           | LINE/L1        | -68                | 6126 | 5941 |         |         |                         |             |
|                 | 68483             | 68518  | +      | AT_rich         | Low_complexity | 1                  | 36   | 0    |         |         |                         |             |
| AC214603.3      | 90728             | 91565  | +      | SVA_A           | Other          | 3                  | 872  | -515 | 156     | 24      | AAGAAATGTAAATGGT        | TCTT/GT     |
|                 | 91577             | 91968  | +      | SVA_A           | Other          | 470                | 876  | -511 |         |         |                         |             |
|                 | 91992             | 92114  | +      | AluSz6          | SINE/Alu       | 1                  | 130  | -182 |         |         |                         |             |
|                 | 92218             | 92250  | +      | (TTC)n          | Simple_repeat  | 2                  | 33   | 0    |         |         |                         |             |
|                 | 92270             | 92429  | C      | L1ME5           | LINE/L1        | -68                | 6126 | 5941 |         |         |                         |             |
|                 | 92430             | 92457  | +      | AT_rich         | Low_complexity | 1                  | 28   | 0    |         |         |                         |             |
| AC198100.1      | 103660            | 105105 | +      | SVA_A           | Other          | 1                  | 870  | -517 | 156     | 65      | AAGAAGGTAAAGC           | TCTT/AA     |
|                 | 105117            | 106382 | +      | SVA_A           | Other          | 436                | 872  | -515 |         |         |                         |             |
|                 | 106394            | 107407 | +      | SVA_A           | Other          | 436                | 872  | -515 |         |         |                         |             |
|                 | 107453            | 108589 | +      | SVA_A           | Other          | 436                | 872  | -515 |         |         |                         |             |
|                 | 108590            | 109012 | +      | SVA_A           | Other          | 436                | 872  | -515 |         |         |                         |             |
|                 | 109058            | 109472 | +      | SVA_A           | Other          | 436                | 872  | -515 |         |         |                         |             |
|                 | 109515            | 109932 | +      | SVA_A           | Other          | 436                | 872  | -515 |         |         |                         |             |
|                 | 109997            | 110116 | +      | AluSz6          | SINE/Alu       | 1                  | 130  | -182 |         |         |                         |             |
|                 | 110272            | 110426 | C      | L1ME5           | LINE/L1        | -68                | 6126 | 5941 |         |         |                         |             |
| AC202765.2      | 108793            | 108833 | +      | (T)n            | Simple_repeat  | 1                  | 41   | 0    | 180     | 16      | AGAAAGGGACAC            | TCTT/AA     |
|                 | 108834            | 108993 | +      | L1ME5           | LINE/L1        | 5941               | 6126 | -68  |         |         |                         |             |
|                 | 109013            | 109045 | +      | (GAA)n          | Simple_repeat  | 2                  | 33   | 0    |         |         |                         |             |
|                 | 109173            | 109280 | C      | AluSz6          | SINE/Alu       | -204               | 108  | 1    |         |         |                         |             |
|                 | 109296            | 110304 | C      | SVA_A           | Other          | -507               | 875  | 428  |         |         |                         |             |
|                 | 110305            | 111127 | C      | SVA_A           | Other          | -517               | 870  | 4    |         |         |                         |             |
| CT954291.6      | 37551             | 37713  | +      | L1ME5           | LINE/L1        | 5941               | 6126 | -68  | 156     | 65      | AAGACTGTCCCTGATCAA      | TCTT/CA     |
|                 | 37733             | 37765  | +      | (GAA)n          | Simple_repeat  | 2                  | 33   | 0    |         |         |                         |             |
|                 | 37869             | 37991  | C      | AluJb           | SINE/Alu       | -182               | 130  | 1    |         |         |                         |             |
|                 | 38056             | 38804  | C      | SVA_A           | Other          | -515               | 872  | 436  |         |         |                         |             |

| BAC Acc. Number | Position in query |        |        | Matching repeat |                | Position in Repeat |      |       | U2 Size | U1 Size | Target Site Duplication               | Target site |
|-----------------|-------------------|--------|--------|-----------------|----------------|--------------------|------|-------|---------|---------|---------------------------------------|-------------|
|                 | Start             | Stop   | Strain | Repeat          | Class/Family   | Start              | Stop | left  |         |         |                                       |             |
| CT954309.16     | 23411             | 24094  | +      | SVA_A           | Other          | 436                | 872  | -515  | 150     | 29      | AAAAATTAGTCGGGCA                      | TTTT/GT     |
|                 | 24123             | 24245  | +      | AluJb           | SINE/Alu       | 1                  | 130  | -182  |         |         |                                       |             |
|                 | 24395             | 24557  | C      | L1ME5           | LINE/L1        | -68                | 6126 | 5941  |         |         |                                       |             |
| AC200379.2      | 118910            | 120107 | C      | SVA_A           | Other          | -511               | 876  | 61    | 45      | 277     | AAAAAGCTTATCCACCACA                   | TTTT/GA     |
|                 | 120120            | 120260 | +      | (TA)n           | Simple_repeat  | 1                  | 149  | 0     |         |         |                                       |             |
|                 | 120384            | 120678 | +      | AluSx1          | SINE/Alu       | 1                  | 295  | -17   |         |         |                                       |             |
|                 | 120723            | 120851 | C      | L1ME4a          | LINE/L1        | -264               | 5860 | 5729  |         |         |                                       |             |
|                 | 120852            | 120872 | +      | AT_rich         | Low_complexity | 1                  | 21   | 0     |         |         |                                       |             |
| AC200379.2      | 140471            | 141754 | +      | SVA_A           | Other          | 64                 | 876  | -511  | 153     | 24      | AAAAATTAGTCGGGCA                      | TTTT/GT     |
|                 | 141778            | 141900 | +      | AluJb           | SINE/Alu       | 1                  | 130  | -182  |         |         |                                       |             |
|                 | 142053            | 142211 | C      | L1ME5           | LINE/L1        | -68                | 6126 | 5941  |         |         |                                       |             |
|                 | 142222            | 142244 | +      | (TAAAAA)n       | Simple_repeat  | 2                  | 24   | 0     |         |         |                                       |             |
| AC206377.2      | 45758             | 45850  | +      | SVA_A           | Other          | 569                | 660  | -727  | 180     | 29      | insertion into A-rich sequence        |             |
|                 | 45879             | 45987  | +      | AluSz6          | SINE/Alu       | 1                  | 108  | -204  |         |         |                                       |             |
|                 | 46081             | 46370  | C      | AluYc3          | SINE/Alu       | -10                | 290  | 1     |         |         |                                       |             |
|                 | 46404             | 46436  | +      | (TTC)n          | Simple_repeat  | 2                  | 33   | 0     |         |         |                                       |             |
|                 | 46456             | 46618  | C      | L1ME5           | LINE/L1        | -68                | 6126 | 5941  |         |         |                                       |             |
|                 | 46619             | 46654  | +      | AT_rich         | Low_complexity | 1                  | 36   | 0     |         |         |                                       |             |
| AC204446.3      | 160534            | 160561 | +      | AT_rich         | Low_complexity | 1                  | 28   | 0     | 167     | 24      | AAAAAAAAAGAACTAGAGGC                  | TTTT/GA     |
|                 | 160562            | 160724 | +      | L1ME5           | LINE/L1        | 5941               | 6126 | -68   |         |         |                                       |             |
|                 | 160743            | 160814 | +      | GA-rich         | Low_complexity | 4                  | 78   | 0     |         |         |                                       |             |
|                 | 160885            | 161180 | C      | AluYc3          | SINE/Alu       | -9                 | 291  | 2     |         |         |                                       |             |
|                 | 161186            | 161308 | C      | AluSz6          | SINE/Alu       | -182               | 130  | 1     |         |         |                                       |             |
|                 | 161332            | 162651 | C      | SVA_A           | Other          | -511               | 876  | 15    |         |         |                                       |             |
| AC214654.2      | 31664             | 31815  | +      | SVA_A           | Other          | 142                | 297  | -1090 | 156     | 29      | insertion into middle A-rich sequence |             |
|                 | 31855             | 32933  | +      | SVA_A           | Other          | 435                | 872  | -515  |         |         |                                       |             |
|                 | 32962             | 33081  | +      | AluSx1          | SINE/Alu       | 1                  | 130  | -182  |         |         |                                       |             |
|                 | 33237             | 33396  | C      | L1ME5           | LINE/L1        | -68                | 6126 | 5941  |         |         |                                       |             |
|                 | 33397             | 33420  | +      | (A)n            | Simple_repeat  | 1                  | 24   | 0     |         |         |                                       |             |
| AC208823.3      | 144449            | 144489 | +      | T-rich          | Low_complexity | 1                  | 41   | 0     | 156     | 24      | AAAGAATGGGCAAGG                       | CTTT/GT     |
|                 | 144490            | 144649 | +      | L1ME5           | LINE/L1        | 5941               | 6126 | -68   |         |         |                                       |             |
|                 | 144805            | 144924 | C      | AluSx           | SINE/Alu       | -182               | 130  | 1     |         |         |                                       |             |
|                 | 144948            | 146201 | C      | SVA_A           | Other          | -511               | 876  | 436   |         |         |                                       |             |

| BAC Acc. Number | Position in query |        |        | Matching repeat |                | Position in Repeat |      |      | U2 Size | U1 Size | Target Site Duplication | Target site |
|-----------------|-------------------|--------|--------|-----------------|----------------|--------------------|------|------|---------|---------|-------------------------|-------------|
|                 | Start             | Stop   | Strain | Repeat          | Class/Family   | Start              | Stop | left |         |         |                         |             |
| AC209355.3      | 165847            | 167150 | +      | SVA_B           | Other          | 9                  | 872  | -515 | 171     | 24      | unknown                 | CTTT/CT     |
|                 | 167196            | 167615 | +      | SVA_A           | Other          | 436                | 876  | -511 |         |         |                         |             |
|                 | 167639            | 167746 | +      | AluSx1          | SINE/Alu       | 1                  | 108  | -204 |         |         |                         |             |
|                 | 167917            | 168076 | C      | L1ME5           | LINE/L1        | -68                | 6126 | 5941 |         |         |                         |             |
|                 | 168077            | 168099 | +      | AT_rich         | Low_complexity | 1                  | 23   | 0    |         |         |                         |             |
| AC214650.2      | 100429            | 100591 | +      | L1ME5           | LINE/L1        | 5941               | 6126 | -68  | 150     | 29      | AAAAATTAGTCGGGCA        | TTTT/GA     |
|                 | 100741            | 100863 | C      | AluJb           | SINE/Alu       | -182               | 130  | 1    |         |         |                         |             |
|                 | 100892            | 101576 | C      | SVA_A           | Other          | -515               | 872  | 436  |         |         |                         |             |
| AC214652.3      | 167741            | 168230 | +      | SVA_A           | Other          | 437                | 870  | -517 | 169     | 29      | insertion into polyA    |             |
|                 | 168259            | 168365 | +      | AluJr           | SINE/Alu       | 1                  | 108  | -204 |         |         |                         |             |
|                 | 168482            | 168514 | +      | (TTC)n          | Simple_repeat  | 2                  | 33   | 0    |         |         |                         |             |
|                 | 168534            | 168693 | C      | L1ME5           | LINE/L1        | -68                | 6126 | 5941 |         |         |                         |             |
|                 | 168694            | 168722 | +      | AT_rich         | Low_complexity | 1                  | 29   | 0    |         |         |                         |             |
| AC208960.3      | 117331            | 117448 | C      | SVA_A           | Other          | -764               | 623  | 506  | 169     | 14      | AGAAAAGACAGATCCC        | TTCT/AA     |
|                 | 117516            | 117944 | +      | SVA_A           | Other          | 436                | 885  | -502 |         |         |                         |             |
|                 | 117958            | 118064 | +      | AluSx           | SINE/Alu       | 1                  | 108  | -204 |         |         |                         |             |
|                 | 118233            | 118392 | C      | L1ME5           | LINE/L1        | -68                | 6126 | 5941 |         |         |                         |             |
|                 | 118393            | 118417 | +      | (A)n            | Simple_repeat  | 1                  | 46   | -42  |         |         |                         |             |
| AC182776.2      | 79313             | 79432  | +      | L1ME5           | LINE/L1        | 5941               | 6061 | -133 | 209     | 29      | Aa/gAAGCCTGTAGC         | TTTT/AA     |
|                 | 79641             | 79747  | C      | AluJr           | SINE/Alu       | -204               | 108  | 1    |         |         |                         |             |
|                 | 79776             | 81079  | C      | SVA_A           | Other          | -515               | 872  | 436  |         |         |                         |             |
|                 | 81080             | 82389  | C      | SVA_A           | Other          | -515               | 872  | 436  |         |         |                         |             |
